# Supplementary material for: Improving Electron Extraction Ability and Device Stability of Perovskite Solar Cells Using a Compatible PCBM/AZO Electron Transporting Bilayer
Source: MDPI journal article supplement (doi:10.3390/nano8090720), 2018-09-12
Supplement: s1 [file s1]

# Improving Electron Extraction Ability and Device Stability of Perovskite Solar Cells by Using a Compatible PCBM/AZO Electron Transporting Bilayer

Hang Dong, Shangzheng Pang, Yi Zhang \*, Dazheng Chen, Weidong Zhu, He Xi, Jingjing Chang, Jincheng Zhang, Chunfu Zhang \* and Yue Hao

State Key Discipline Laboratory of Wide Band Gap Semiconductor Technology, School of Microelectronics, Xidian University, 2 South Taibai Road, Xi'an 710071, China; donghangxd@163.com (H.D.); shangzhengpang@qq.com (S.P.); dzchen@xidian.edu.cn (D.C.); wdzhu@xidian.edu.cn (W.Z.); hxi@xidian.edu.cn (H.X.); jjingchang@xidian.edu.cn (J.C.); jchzhang@xidian.edu.cn (J.Z.); yhao@xidian.edu.cn (Y.H.)

\* Correspondence: hyper\_sys@163.com (Y.Z.); cfzhang@xidian.edu.cn (C.Z.)

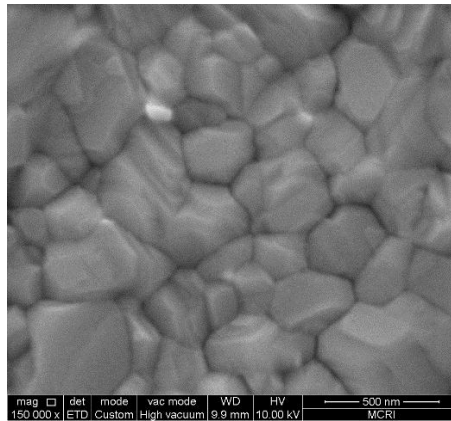

Figure S1. Top-view SEM image of the surface morphology of perovskite.

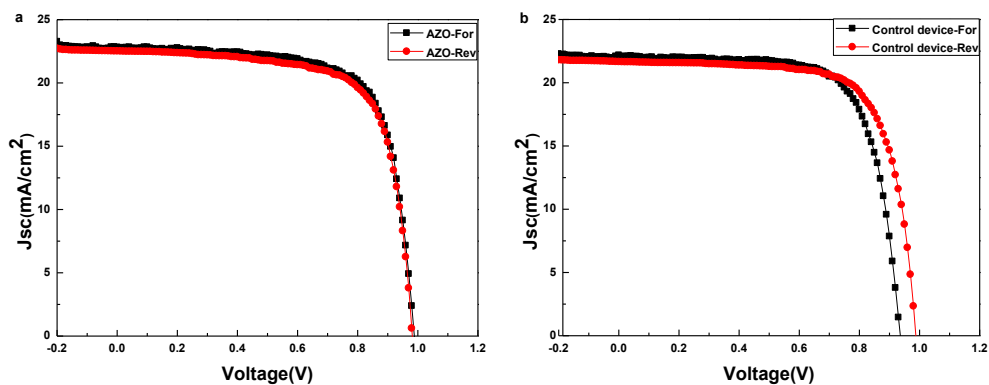

Figure S2. (a) J-V curves in forward and reverse scans of PSCs with AZO, (b) J-V curves in forward and reverse scans of PSCs without AZO.

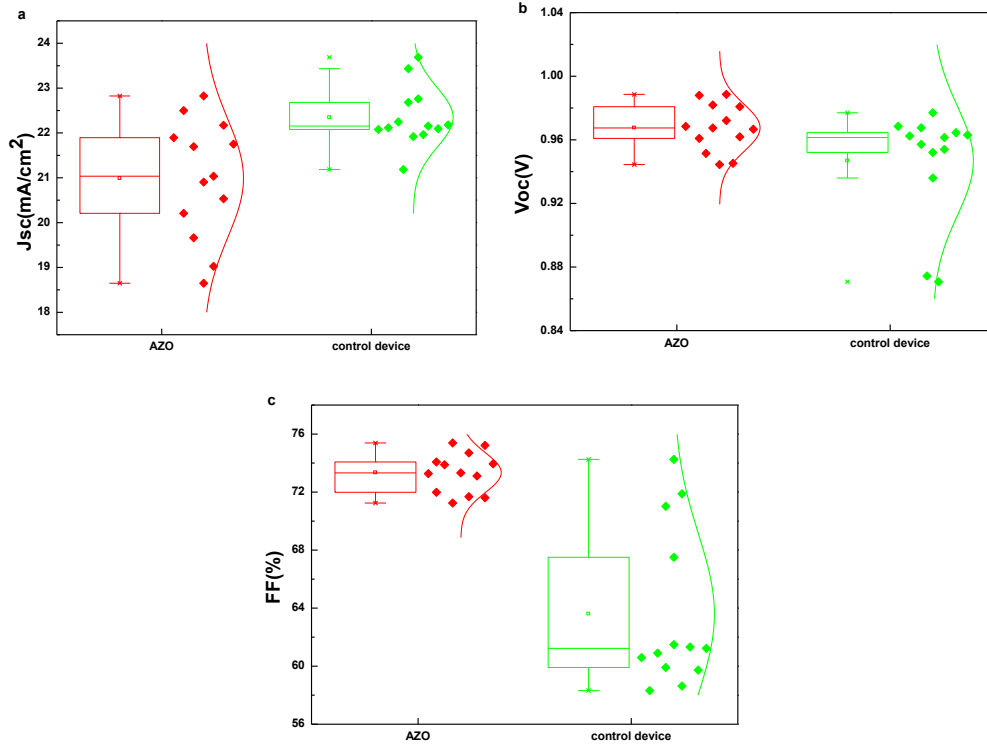

**Figure S3.** Statistics results of  $J_{sc}$  (a)  $V_{oc}$  (b) and FF (c) for PSCs with/without AZO.

**Table S1.** Statistical results of perovskite solar cells under AM 1.5G illumination (100 mW/cm<sup>2</sup>). The standard deviation results are derived from 12 perovskite solar cells.

|                | $J_{sc}$ (mA/cm <sup>2</sup> ) | $V_{oc}$ (V)     | FF (%)          | PCE (%)                  |
|----------------|--------------------------------|------------------|-----------------|--------------------------|
| AZO            | $20.99 \pm 1.32$               | $0.97 \pm 0.014$ | $73.34 \pm 1.3$ | $14.89 \pm 0.84$ (16.19) |
| Control device | $22.35 \pm 0.66$               | $0.95 \pm 0.033$ | $63.60 \pm 5.3$ | $13.42 \pm 0.72$ (14.75) |

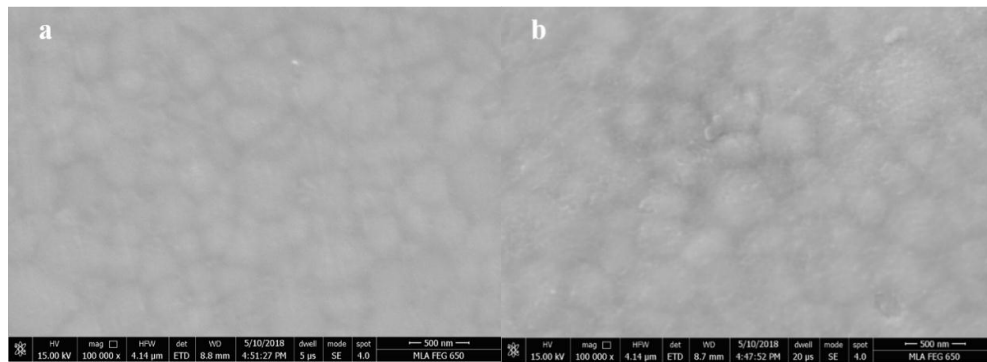

**Figure S4.** SEM graphs of (a) ITO/PEDOT:PSS/perovskite/PCBM and (b) ITO/PEDOT:PSS/perovskite/PCBM/AZO.

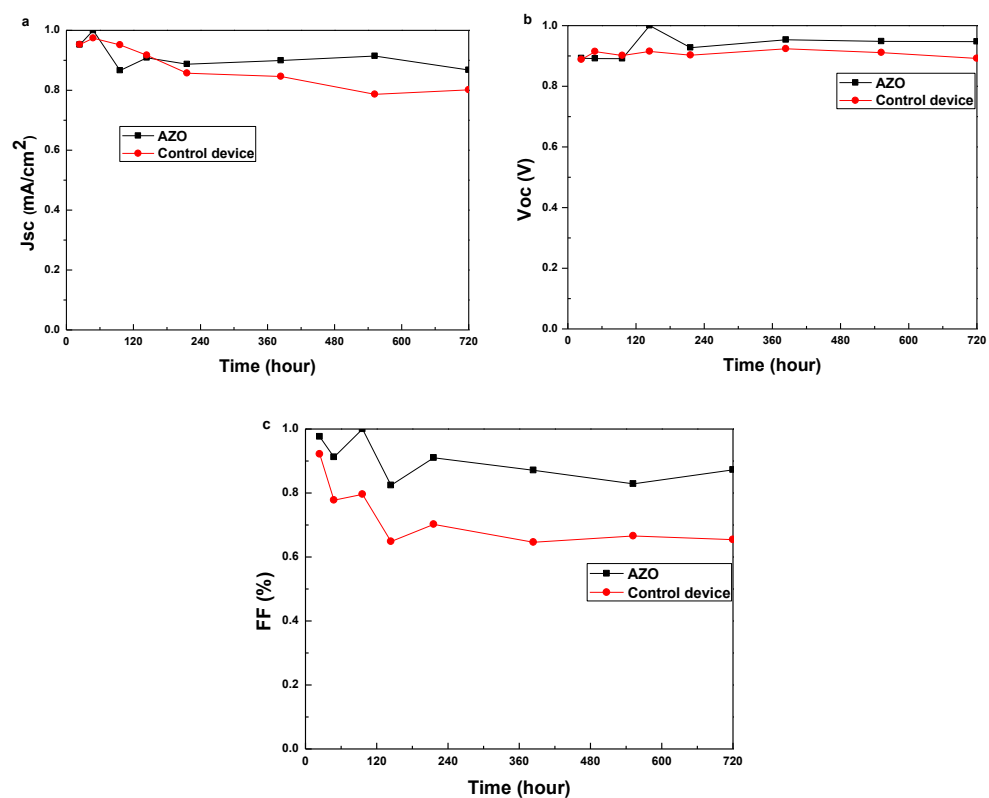

**Figure S5.** Stability of (a) Jsc (b) Voc and (c) FF for unencapsulated devices with/without AZO.
